# Supplementary material for: miRNA Expression Is Increased in Serum from Patients with Semantic Variant Primary Progressive Aphasia
Source: MDPI journal article supplement (doi:10.3390/ijms23158487), 2022-07-30
Supplement: s1 [file s1]

Supplementary Table S1: List of 479 mRNA target overlapped between miR-133a-3p and miR-106b-5p using two bioinformatic tools: TargetScan and miRDB.

LASP1  
BCL2L2  
TRIQQ  
GDNF  
TAGLN2  
CORO1C  
WASF2  
SYT2  
PTBP2  
GABARAPL1  
GPM6A  
SCN2B  
DUSP1  
DCLRE1A  
RAP2C  
STOM  
NRIP3  
SHISA5  
FOXL2  
AKAP9  
ZNF280C  
RCL1  
THRAP3  
VAPB  
CTBP2  
STX5  
CERS2  
LHX5  
PFKFB3  
MECOM  
ZNF436  
SLC7A8  
VAT1  
SOGA1  
PCDHGA12  
FGF1  
KCTD20  
ARFIP2  
CAPN15  
NAGS  
PML  
YES1  
MSN  
CCDC117

FBXL2  
PRRT2  
SMARCD1  
PRRX1  
TFE3  
GRM5  
EMP2  
FAM117B  
HAPLN1  
YPEL2  
MAML3  
GNAI3  
TXLNA  
TTYH3  
POU4F1  
SEC61B  
KPNA6  
PREX1  
CAMKK2  
PROX2  
FAM49A  
CNTNAP1  
TMEM167A  
KLHDC10  
CACUL1  
CELF5  
PITPNM2  
NELFA  
FTL  
GPR173  
ZNF322  
CETN3  
MYH9  
TFAP2D  
PTH1R  
CMTM6  
KLF7  
CDYL2  
CLTA  
TGFBFR1  
NIPA1  
PAX7  
TIMM17A  
QKI  
SF3B4  
SLC50A1

PTBP1  
PPP2CA  
KLHL11  
BICC1  
CNN2  
KIF3C  
SIMC1  
MLLT3  
TBPL1  
DOLPP1  
VPS54  
ATP6AP2  
TRAM2  
RARB  
SNX15  
SGMS2  
SLC6A1  
SFXN5  
USP6  
UNC13A  
SGPP1  
SLC30A7  
ZC3H7A  
SGK1  
LPGAT1  
MYRF  
ZC3H11A  
SV2A  
SP3  
AFTPH  
TMOD3  
LANCL2  
CMPK1  
ZNF131  
RBMX  
UBA2  
PPP2CB  
ELFN1  
MRC2  
ARHGAP12  
ANKRD28  
STXBP6  
SOX4  
FOXC1  
RAVER1  
CRTAM

GABPB2  
PPFIA2  
PLEKHA3  
SYT1  
PTPRZ1  
RPL17-  
C18orf32  
LRRC7  
NDRG1  
UBE2Q1  
PTPRK  
PFN2  
SESN1  
SNRK  
GLRA2  
BCORL1  
MEIS2  
BTBD3  
TMEM170B  
ANKRD44  
CDK13  
EDEM1  
RBPJ  
EXD2  
SLC6A6  
SOBP  
CPNE3  
PAN3  
XPO4  
HS2ST1  
SUPT16H  
RBMXL1  
GDI2  
ARHGDIA  
RIMS1  
NIPA2  
GXYLT1  
PTPRD  
ARHGAP9  
SACM1L  
MAML1  
CREB5  
RB1CC1  
CRK  
SGTB  
MEIS1

DOT1L  
FGFR1  
GRID2  
ANKRD12  
FOXP4  
MMP15  
MED12L  
SYNPO2L  
EPHA7  
UBXN7  
ELAVL1  
TENM1  
PRDM16  
GNB4  
PEX5L  
EPS15  
PTBP3  
AFAP1  
SOGA3  
FLVCR1  
MLXIP  
USP32  
RUNX1T1  
CSNK1G3  
PIK3C2A  
ASH1L  
FAM160B1  
TRHDE  
SLC4A8  
AMD1  
CNOT1  
NFAT5  
ARRB1  
JAZF1  
CYLD  
HIC2  
RTN4RL1  
WIPI2  
FOXP2  
CHD3  
ADCYAP1  
NUP153  
ZC3H14  
SRPK1  
MCL1  
GDAP2

ERP44  
ZNF367  
ARID4B  
DYNC1LI2  
SLITRK3  
STAT3  
NABP1  
NR4A3  
AKTIP  
SMOC1  
NPAS2  
PPP1R21  
USP3  
AMER2  
REEP3  
KIF5A  
CADM2  
ARHGEF28  
RBBP7  
LDLR  
FASTK  
LAMP5  
TGFB1I1  
B3GALT2  
ANKRD50  
LAPTM4A  
GNS  
EREG  
ARHGAP1  
ZBTB4  
BTBD7  
UXS1  
NAA30  
FAM19A1  
JAK1  
NRSN1  
S1PR1  
NEUROG1  
RAB12  
HMBOX1  
IRF1  
CHD9  
ERI1  
YOD1  
TNFSF11  
NEDD4L

MAT2B  
NEUROG2  
TNKS1BP1  
ZNF217  
TMUB2  
IQSEC1  
PRDM6  
PITPNA  
UNKL  
SLC41A1  
TIMP2  
ESR1  
MYCN  
FAM102A  
ATE1  
YPEL4  
METAP1  
PSD  
RAPGEF4  
TBC1D8B  
LRRC55  
MAP3K8  
ARL4C  
FRMD4A  
ZNF704  
PPP1R15B  
MAP3K9  
TNFAIP1  
CABLES1  
RNF38  
ERBB3  
RAPGEFL1  
DAZAP2  
PDGFRA  
GBF1  
NRBP1  
ANKFY1  
DCUN1D3  
MYO1D  
TMEM123  
SUMF1  
C2orf69  
TSHZ3  
NOL4  
KLHL20  
CRIM1

PAF1  
FAM126B  
ELK4  
ZHX2  
ARHGEF3  
DAB2  
IL25  
POLQ  
PAFAH1B2  
SCAMP2  
STX6  
MAP7  
PHF1  
FRMD4B  
RBMS1  
HMGB3  
PCDHA2  
PCDHA10  
PCDHA4  
PCDHA7  
PCDHA5  
PCDHA12  
WEE1  
PCDHA11  
PCDHAC1  
PCDHA9  
PCDHA6  
PCDHA1  
PCDHA13  
PCDHA3  
PCDHA8  
CHIC1  
PGBD5  
MAP3K12  
ZNF385A  
PCDHAC2  
KIAA1522  
ARAP2  
RPS6KA1  
SCN2A  
ZNF202  
RND3  
SUCC  
NEK9  
SMAD5  
E2F2



SNTB2  
BNC2  
RNF145  
PLEKHO2  
PANK3  
PLEKHM1  
DIP2A  
TLE4  
CPEB3  
FAM117A  
SH3BP5  
PKN2  
SFMBT1  
FXR1  
TMEM168  
YTHDF3  
FGF4  
KIF3B  
EIF5A2  
ITCH  
BICD2  
OCRL  
BBX  
SLC35F3  
NEURL1B  
SNX21  
MAPK4  
CEP170  
EPHB4  
DCBLD2  
RACGAP1  
SKI  
HECA  
STYX  
NFIB  
RAB30  
MAP3K1  
SLC4A4  
VEGFA  
DEDD  
CHD5  
PLCB1  
CIT  
PPP6R3  
NDEL1  
GOSR1

LIMK1  
RGS4  
CYP26B1  
AKT3  
SALL1  
TBX3  
PHIP  
STK11IP  
RASGEF1A  
ACSL4  
ZNF532  
MYNN  
MCM3  
IL1RAP  
INO80  
FOXA1  
ZNF236  
KIF26B  
FNDC3A  
C16orf72  
RPS6KA2  
SRGAP1  
IPO9  
SLC24A4  
IPCEF1  
THBS2  
UBR5  
KMT2C  
TBC1D2  
COL4A1  
ALX4  
DUSP8  
TSKU  
SULF1  
FMNL3  
CREB1  
MYCL  
FGF5  
ANKRD29  
UBASH3B  
RAB11FIP4  
TSPAN9  
ACBD5  
IGSF10  
SSH1  
AFF4

SLC25A36

LRP1B

ZBTB6

ABI1

CELSR2

SP8

ITFG1

ZRANB1

HP1BP3

UBE2Q2

SPTY2D1

ZNF652

GID4

TMEM50B

MECP2

SRGAP3

SESN3

NUFIP2

RPS6KA6

GGCX

PPP6R2

UBASH3A

Supplementary Table S2: gene target involved in cerebral physiopathology

| Overlapping target mRNAs between miR-133a-3p and miR-106b-5p | Involvement in neurological conditions or neurobiology                                                                        | References                                             |
|--------------------------------------------------------------|-------------------------------------------------------------------------------------------------------------------------------|--------------------------------------------------------|
| ARHGAP12                                                     | Synapse development                                                                                                           | Ba et al 2016                                          |
| CMPK1                                                        |                                                                                                                               |                                                        |
| CRK                                                          |                                                                                                                               |                                                        |
| DERL2                                                        | Brain atrophy in the cerebellum and striatum, reduced neurite outgrowth and motor function in KO mice                         | Sugiyama et al, 2021                                   |
| DNAJB6                                                       | Anti-amyloidogenic in neurons                                                                                                 | Thiruvalluvan et al, 2020                              |
| DYNC1LI2                                                     | Motor and sensory neuron loss in mice with dynein mutation                                                                    | Deng et al, 2010                                       |
| ENPP5                                                        | upregulated in astrocytes, oligodendrocytes and neurons of AD mouse model                                                     | Pietrowski et al, 2021                                 |
| EPHA7                                                        | Neurodevelopment disorder                                                                                                     | Lévy et al, 2021                                       |
| FAM117B                                                      | Associated with genetic risk of AD                                                                                            | Madrid et al, 2021                                     |
| FAM13A                                                       |                                                                                                                               |                                                        |
| FBXW11                                                       | Neuroprotection, increased expression in AD mouse model                                                                       | Sun et al, 2021                                        |
| FOXL2                                                        |                                                                                                                               |                                                        |
| FOXQ1                                                        | Senescence, inflammation/ AD cellular model                                                                                   | Wang et al, 2017<br>Zhuang et al, 2020<br>Maiese, 2016 |
| FURIN                                                        | Neuronal cell death                                                                                                           | Yamada et al, 2018                                     |
| HLF                                                          | Epilepsy, mouse model                                                                                                         | Hawkins & Kearny, 2018                                 |
| HMBOX1                                                       | Associated with genetic risk of AD                                                                                            | Li et al, 2021                                         |
| HS3ST5                                                       | Associated with genetic risk of AD                                                                                            | Bellenguez et al, 2022<br>Pérez-López et al, 2021      |
| KLHL2                                                        |                                                                                                                               |                                                        |
| LASP1                                                        | Associated with global cognitive function, category verbal fluency, and spatial working memory of patients with schizophrenia | Li et al, 2019                                         |
| LPGAT1                                                       | AD (cell model)                                                                                                               | Lin et al, 2018                                        |
| MAP3K2                                                       |                                                                                                                               |                                                        |
| MED12L                                                       | Intellectual disability developmental delay or speech impairment in individuals with MED12L deletion                          | Nizon et al, 2019                                      |
| MINK1                                                        | Synapse loss in AD                                                                                                            | Lawingco et al, 2021                                   |
| NTNG1                                                        | Cortical layer structure in mammals                                                                                           | Yaguchi et al, 2014                                    |
| PFN2                                                         | Associated with Charcot-Marie-Tooth type 2                                                                                    | Juneja et al, 2018                                     |
| PLEKHA3                                                      |                                                                                                                               |                                                        |
| PRDM6                                                        |                                                                                                                               |                                                        |
| RAP2C                                                        |                                                                                                                               |                                                        |
| RRAGD                                                        |                                                                                                                               |                                                        |
| SGTB                                                         |                                                                                                                               |                                                        |

|         |                                           |                                              |
|---------|-------------------------------------------|----------------------------------------------|
| SLC41A1 | Associated with genetic risk for PD       | Li et al, 2021, Cibulka et al, 2022          |
| SMIM14  | FTD                                       | Dickson et al, 2019                          |
| SOBP    |                                           |                                              |
| SOX4    |                                           |                                              |
| TIMM17A | Mitochondrial protein downregulated in AD | Liang et al, 2008<br>Bogorodskiy et al, 2021 |
| TMEM64  |                                           |                                              |
| TTPAL   | Differential expressed in AD              | Li et al, 2015                               |
| YPEL2   |                                           |                                              |
| ZNF385A |                                           |                                              |

ARHGAP12, Rho GTPase Activating Protein 12; CMPK1, Cytidine/Uridine Monophosphate Kinase; CRK, CRK Proto-Oncogene, Adaptor Protein; DNAJB6, DnaJ Heat Shock Protein Family (Hsp40) Member B6; DYNC1LI2, motorDynein Cytoplasmic 1 Light Intermediate Chain 2; ENPP5, Ectonucleotide Pyrophosphatase/Phosphodiesterase Family Member 5; EPHA7, ephrin receptor A7; FAM117B, Family With Sequence Similarity 117 Member B; FAM13A, Family With Sequence Similarity 13 Member A; FBXW11, F-box and WD-40 domain protein 11; FOXL2, forkhead box L2; FOXQ1, Forkhead Box Q1; HLF, HLF transcription factor; HMBOX1, Homeobox Containing 1; HS3ST5, Heparan Sulfate-Glucosamine 3-Sulfotransferase 5; KLHL2, Kelch-like protein family member 2; LASP1, LIM And SH3 Protein 1; LPGAT1, lysophosphatidylglycerol acyltransferase 1; netrin-G1, Mediator Complex Subunit 12L, MED12L; MAP3K2, Mitogen-activated Protein Kinase Kinase Kinase 2; MINK1, Misshapen Like Kinase 1; NTNG1, Netrin-G1; PFN2, Profilin-2; PLEKHA3, Pleckstrin Homology Domain-Containing Family A Member 3; PRDM6, Putative histone-lysine N-methyltransferase; RAP2C, Ras-Related Protein Rap-2c; RRAGD, Ras-Related GTP-Binding Protein D; SGTB, , Small Glutamine Rich Tetratricopeptide Repeat Co-Chaperone Beta, SLC41A1, Solute Carrier Family 41 Member 1; SMIM14 Small Integral Membrane Protein 14; SOBP, Sine Oculis Binding Protein Homolog; SOX4, SRY-Box Transcription Factor 4; TIMM17A, Translocase Of Inner Mitochondrial Membrane 17A; TMEM64Transmembrane Protein 64; TTPAL, alpha tocopherol transfer protein like; YPEL, yippee like; ZNF385A, Zinc Finger Protein 385A.

## References not included in the main text

Wenhan Deng, Caroline Garrett, Benjamin Dombert, Violetta Soura, Gareth Banks, Elizabeth M.C. Fisher, Marcel P. van der Brug, Majid Hafezparast, Neurodegenerative Mutation in Cytoplasmic Dynein Alters Its Organization and Dynein-Dynactin and Dynein-Kinesin Interactions\*, Journal of Biological Chemistry, Volume 285, Issue 51, 2010, Pages 39922-39934, ISSN 0021-9258, <https://doi.org/10.1074/jbc.M110.178087>

Pietrowski Marie J., Gabr Amr Ahmed, Kozlov Stanislav, Blum David, Halle Annett, Carvalho Kevin. Glial Purinergic Signaling in Neurodegeneration. Frontiers in Neurology, 12, 2021, <https://www.frontiersin.org/article/10.3389/fneur.2021.654850> DOI=10.3389/fneur.2021.654850

Madrid, L., Moreno-Grau, S., Ahmad, S., González-Pérez, A., de Rojas, I., Xia, R., Martino Adami, P. V., García-González, P., Kleineidam, L., Yang, Q., Damotte, V., Bis, J. C., Noguera-Perea, F., Bellenguez, C., Jian, X., Marín-Muñoz, J., Grenier-Boley, B., Orellana, A., Ikram, M. A., Amouyel, P., ... Saez, M. E. (2021). Multiomics integrative analysis identifies APOE allele-specific blood biomarkers associated to Alzheimer's disease etiopathogenesis. *Aging*, 13(7), 9277–9329. Advance online publication. <https://doi.org/10.18632/aging.202950>

Sun J, Qin X, Zhang X, Wang Q, Zhang W, Wang M. FBXW11 deletion alleviates Alzheimer's disease by reducing neuroinflammation and amyloid- $\beta$  plaque formation via repression of ASK1 signaling. *Biochem Biophys Res Commun*. 2021 Apr 9;548:104-111. doi: 10.1016/j.bbrc.2020.12.081. Epub 2021 Feb 25. PMID: 33640602.

Maiese K. (2016). Forkhead transcription factors: new considerations for alzheimer's disease and dementia. *Journal of translational science*, 2(4), 241–247. <https://doi.org/10.15761/JTS.1000146>

Yamada, M., Hayashi, H., Yuuki, M. et al. Furin inhibitor protects against neuronal cell death induced by activated NMDA receptors. *Sci Rep* 8, 5212 (2018). <https://doi.org/10.1038/s41598-018-23567-0>

Li HD, Funk CC, McFarland K, Dammer EB, Allen M, Carrasquillo MM, Levites Y, Chakrabarty P, Burgess JD, Wang X, Dickson D, Seyfried NT, Duong DM, Lah JJ, Younkin SG, Levey AI, Omenn GS, Ertekin-Taner N, Golde TE, Price ND. Integrative functional genomic analysis of intron retention in human and mouse brain with Alzheimer's disease. *Alzheimers Dement*. 2021 Jun;17(6):984-1004. doi: 10.1002/alz.12254.

Lawingco T, Chaudhury S, Brookes KJ, Guetta-Baranes T, Guerreiro R, Bras J, Hardy J, Francis P, Thomas A, Belbin O, Morgan K. Genetic variants in glutamate-, A $\beta$ -, and tau-related pathways determine polygenic risk for Alzheimer's disease. *Neurobiol Aging*. 2021 May;101:299.e13-299.e21. doi: 10.1016/j.neurobiolaging.2020.11.009.

Zhuang Jingcong, Chen Zhongjie, Cai Pingping, Wang Rong, Yang Qingwei, Li Longling, Yang Huili, Zhu Renjing. Targeting MicroRNA-125b Promotes Neurite Outgrowth but Represses Cell Apoptosis and Inflammation via Blocking PTGS2 and CDK5 in a FOXQ1-Dependent Way in Alzheimer Disease. *Frontiers in Cellular Neuroscience*,14, 2020  
<https://www.frontiersin.org/article/10.3389/fncel.2020.587747>  
DOI=10.3389/fncel.2020.587747

Wang, P., Lv, C., Zhang, T. et al. FOXQ1 regulates senescence-associated inflammation via activation of SIRT1 expression. *Cell Death Dis* 8, e2946 (2017). <https://doi.org/10.1038/cddis.2017.340>

Bellenguez, C., Küçükali, F., Jansen, I.E. et al. New insights into the genetic etiology of Alzheimer's disease and related dementias. *Nat Genet* **54**, 412–436 (2022). <https://doi.org/10.1038/s41588-022-01024-z>

Nizon, M., Laugel, V., Flanigan, K.M. et al. Variants in *MED12L*, encoding a subunit of the mediator kinase module, are responsible for intellectual disability associated with transcriptional defect. *Genet Med* **21**, 2713–2722 (2019). <https://doi.org/10.1038/s41436-019-0557-3>

Lawingco T, Chaudhury S, Brookes KJ, Guetta-Baranes T, Guerreiro R, Bras J, Hardy J, Francis P, Thomas A, Belbin O, Morgan K. Genetic variants in glutamate-, A $\beta$ -, and tau-related pathways determine polygenic risk for Alzheimer's disease. *Neurobiol Aging*. 2021 May;101:299.e13-299.e21. doi: 10.1016/j.neurobiolaging.2020.11.009.

Yaguchi K, Nishimura-Akiyoshi S, Kuroki S, Onodera T, Itohara S. Identification of transcriptional regulatory elements for Ntng1 and Ntng2 genes in mice. *Mol Brain*. 2014 Mar 19;7:19. doi: 10.1186/1756-6606-7-19. PMID: 24642214; PMCID: PMC4000137.

Manisha Juneja, Abdelkrim Azmi, Jonathan Baets, Andreas Roos, Matthew J Jennings, Paola Saveri, Chiara Pisciotto, Nathalie Bernard-Marissal, Bernard L Schneider, Catherine Verfaillie, Roman Chrast, Pavel Seeman, Angelika F Hahn, Peter de Jonghe, Stuart Maudsley, Rita Horvath, Davide Pareyson, Vincent Timmerman. PFN2 and GAMT as common molecular determinants of axonal Charcot-Marie-Tooth disease  
*Journal of Neurology, Neurosurgery & Psychiatry*, 2018

Liang, W. S., Reiman, E. M., Valla, J., Dunckley, T., Beach, T. G., Grover, A., Niedzielko, T. L., Schneider, L. E., Mastroeni, D., Caselli, R., Kukull, W., Morris, J. C., Hulette, C. M., Schmechel, D., Rogers, J., & Stephan, D. A. (2008). Alzheimer's disease is associated with reduced expression of energy metabolism genes in posterior cingulate neurons. *Proceedings of the National Academy of Sciences of the United States of America*, 105(11), 4441–4446. <https://doi.org/10.1073/pnas.0709259105>

Bogorodskiy, A., Okhrimenko, I., Burkatovskii, D., Jakobs, P., Maslov, I., Gordeliy, V., Dencher, N. A., Gensch, T., Voos, W., Altschmied, J., Haendeler, J., & Borshchevskiy, V. (2021). Role of Mitochondrial Protein Import in Age-Related Neurodegenerative and Cardiovascular Diseases. *Cells*, 10(12), 3528. <https://doi.org/10.3390/cells10123528>

Li, X., Long, J., He, T. et al. Integrated genomic approaches identify major pathways and upstream regulators in late onset Alzheimer's disease. *Sci Rep* **5**, 12393 (2015). <https://doi.org/10.1038/srep12393>

Pérez-López, Martín, C., García, B., Solís-Hernández, M. P., Rodríguez, D., Alcalde, I., Merayo, J., Fernández-Vega, I., & Quirós, L. M. (2021). Alterations in the Expression of the Genes Responsible for the Synthesis of Heparan Sulfate in Brains With Alzheimer Disease. *Journal of Neuropathology and Experimental Neurology*, 80(5), 446–456. <https://doi.org/10.1093/jnen/nlab028>

Pérez-López, Martín, C., García, B., Solís-Hernández, M. P., Rodríguez, D., Alcalde, I., Merayo, J., Fernández-Vega, I., & Quirós, L. M. (2021). Alterations in the Expression of the Genes Responsible for the Synthesis of Heparan Sulfate in Brains With Alzheimer Disease. *Journal of Neuropathology and Experimental Neurology*, 80(5), 446–456. <https://doi.org/10.1093/jnen/nlab028>

Lin, Seo, J., Gao, F., Feldman, H. M., Wen, H.-L., Penney, J., Cam, H. P., Gjonneska, E., Raja, W. K., Cheng, J., Rueda, R., Kritskiy, O., Abdurrob, F., Peng, Z., Milo, B., Yu, C. J., Elmsaouri, S., Dey, D., Ko, T., ... Tsai, L.-H. (2018). APOE4 Causes Widespread

Molecular and Cellular Alterations Associated with Alzheimer's Disease Phenotypes in Human iPSC-Derived Brain Cell Types.  
Neuron (Cambridge, Mass.), 98(6), 1294–1294. <https://doi.org/10.1016/j.neuron.2018.06.011>
